# Supplementary material for: How does the long G·G* Watson–Crick DNA base mispair comprising keto and enol tautomers of the guanine tautomerise? The results of a QM/QTAIM investigation
Source: Royal Society of Chemistry journal article supplement (doi:10.1039/c4cp01241k), 2014-01-01
Supplement: c4cp01241k1.pdf [file c4cp01241k1.pdf]

## Supplementary Materials

### How the long G·G\* Watson-Crick DNA base mispair comprising keto and enol tautomers of the guanine tautomerises? The results of the QM/QTAIM investigation

Ol'ha O. Brovarets' and Dmytro M. Hovorun✉

<sup>a</sup>Department of Molecular and Quantum Biophysics, Institute of Molecular Biology and Genetics, National Academy of Sciences of Ukraine, 150 Akademika Zabolotnoho Str., 03680 Kyiv, Ukraine

<sup>b</sup>Department of Molecular Biotechnology and Bioinformatics, Institute of High Technologies, Taras Shevchenko National University of Kyiv, 2-h Akademika Hlushkova Ave., 03022 Kyiv, Ukraine

✉Corresponding author. Email: dhovorun@imbg.org.ua

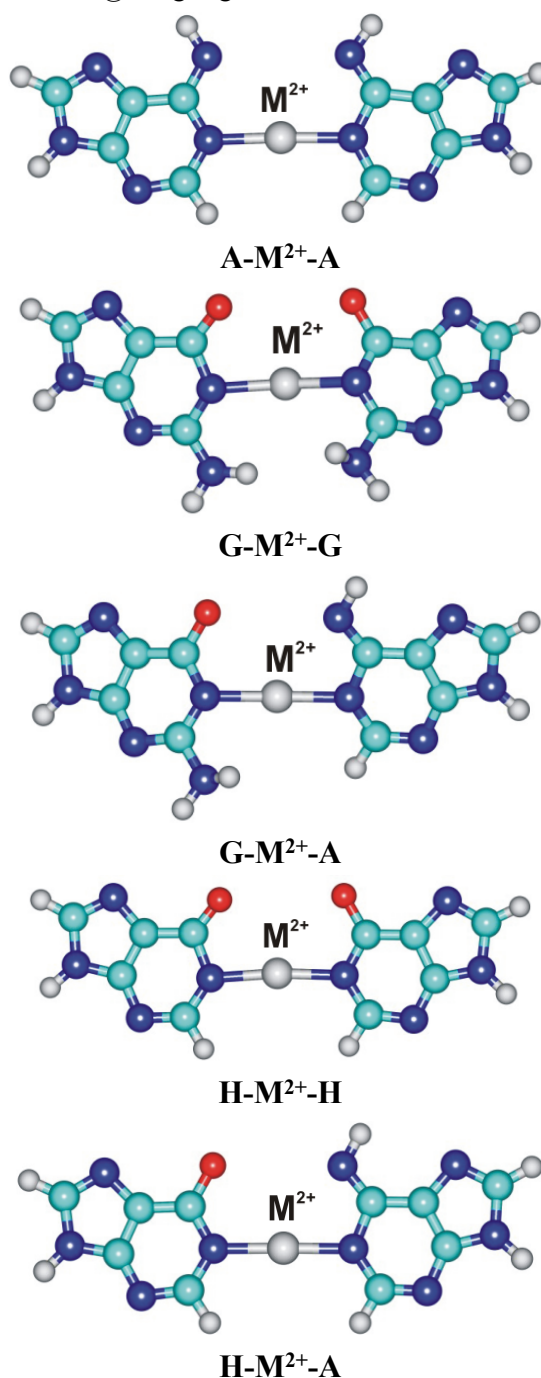

**Figure S1.** Hypothetical metallized purine-purine pairs of nucleotide bases that can be integrated into the DNA double helix. Designation: M<sup>2+</sup> – the doubly charged metal cation, for example Hg<sup>2+</sup> or Ag<sup>2+</sup> [1-3], H – hypoxanthine, G – guanine, A – adenine.

## References:

1. Ono A., Torigoe H., Tanaka Y., Okamoto I. Binding of metal ions by pyrimidine base pairs in DNA duplexes, *Chem. Soc. Rev.*, 2011, **40**, 5855–5866.
2. Ono A., Cao S., Togashi H., Tashiro M., Fujimoto T., Machinami T., Oda S., Miyake Y., Okamoto I., Tanaka Y. Specific interactions between silver(I) ions and cytosine-cytosine pairs in DNA duplexes, *Chem. Commun.*, 2008, 4825–4827.
3. Torigoe H., Ono A., Kozasa T. Hg<sup>II</sup> ion specifically binds with T:T mismatched base pair in duplex DNA, *Chem. Eur. J.*, 2010, **16**, 13218–13225.
